# Supplementary material for: Regulating the morphology and luminescence properties of CsPbBr3 perovskite quantum dots through the rigidity of glass network structure
Source: Royal Society of Chemistry journal article supplement (doi:10.1039/d0tc04498a), 2020-01-01
Supplement: d0tc04498a1.pdf [file d0tc04498a1.pdf]

## Supporting Information

### Regulating the morphology and luminescence properties of CsPbBr<sub>3</sub> perovskite quantum dots through the rigidity of glass network structure

Xiaoliang Pang,<sup>‡,a</sup> Shuaichen Si,<sup>‡,b</sup> Liqing Xie,<sup>a</sup> Xuejie Zhang<sup>\*,a,c</sup> Haozhang Huang,<sup>a</sup> Shuting Liu,<sup>a</sup> Wenxin Xiao,<sup>a</sup> Surui Wang,<sup>a</sup> Tongtong Xuan,<sup>d</sup> Jianle Zhuang,<sup>a,c</sup> Chaofan Hu,<sup>a,c</sup> Yingliang Liu,<sup>a,c</sup> Bingfu Lei,<sup>\*,a,c</sup> and Haoran Zhang<sup>\*,a,c</sup>

<sup>a</sup>Key Laboratory for Biobased Materials and Energy of Ministry of Education, Guangdong Provincial Engineering Technology Research Center for Optical Agriculture, College of Materials and Energy, South China Agricultural University, Guangzhou 510642, China

<sup>b</sup>School of Chemistry, Sun Yat-sen University, Guangzhou 510275, China

<sup>c</sup>Guangdong Laboratory of Lingnan Modern Agriculture, Guangzhou 510642, China

<sup>d</sup>College of Materials, Xiamen University, Xiamen 361005, China

<sup>‡</sup>These authors contributed equally to this work.

#### Corresponding Author:

\*Xuejie Zhang, zhangxuejie@scau.edu.cn;

\*Bingfu Lei, tleibf@scau.edu.cn;

\*Haoran Zhang, hrzhang@scau.edu.cn

**Table S1.** GeO<sub>2</sub>/SiO<sub>2</sub> based inorganic glass compositions of (38-x)GeO<sub>2</sub>-xSiO<sub>2</sub>-34B<sub>2</sub>O<sub>3</sub>-5Al<sub>2</sub>O<sub>3</sub>-4ZnO-5SrO-8Cs<sub>2</sub>O-3PbBr<sub>2</sub>-3NaBr (x = 0~38, in mol%), glass-related component, melting temperature and crystallization condition for fabricating CsPbBr<sub>3</sub> QDs@glass samples. The resultant appearance, luminescence and photoluminescent quantum yield (PLQY) are tabulated.

| SiO <sub>2</sub> contents (mol%) | Melting condition | Crystallization condition | Appearance & luminescence                          | PLQY (%)     |
|----------------------------------|-------------------|---------------------------|----------------------------------------------------|--------------|
| <b>x = 0</b>                     | 1050 °C/30 min    | 460 °C/10 h               | MediumSpringGreen/Transparent; Green/homogeneous   | <b>43.54</b> |
| <b>x = 9.5</b>                   | 1050 °C/30 min    | 490 °C/10 h               | MediumSpringGreen/Transparent; Green/homogeneous   | <b>37.90</b> |
|                                  | 1075 °C/30 min    | 490 °C/10 h               | MediumSpringGreen/Transparent; Green/inhomogeneous | 28.23        |
| <b>x = 19</b>                    | 1050 °C/30 min    | 500 °C/10 h               | Primrose/Translucent; Green/homogeneous            | 13.49        |
|                                  | 1100 °C/30 min    | 500 °C/10 h               | MediumSpringGreen/Transparent; Green/homogeneous   | 13.66        |
|                                  | 1115 °C/30 min    | 500 °C/10 h               | MediumSpringGreen/Transparent; Green/homogeneous   | 24.09        |
|                                  | 1125 °C/30 min    | 500 °C/10 h               | MediumSpringGreen/Transparent; Green/homogeneous   | <b>36.32</b> |
|                                  | 1150 °C/30 min    | 500 °C/10 h               | MediumSpringGreen/Transparent; Green/inhomogeneous | 35.81        |
| <b>x = 28.5</b>                  | 1050 °C/30 min    | 510 °C/10 h               | Yellow/opaque; Green/homogeneous                   | 5.55         |
|                                  | 1165 °C/30 min    | 510 °C/10 h               | MediumSpringGreen/Transparent; Green/homogeneous   | <b>19.45</b> |
|                                  | 1175 °C/30 min    | 510 °C/10 h               | MediumSpringGreen/Transparent; Green/homogeneous   | 18.16        |
|                                  | 1200 °C/30 min    | 510 °C/10 h               | MediumSpringGreen/Transparent; Green/inhomogeneous | —            |
| <b>x = 38</b>                    | 1200 °C/30 min    | 520 °C/10 h               | MediumSpringGreen/Transparent; Green/homogeneous   | <b>17.58</b> |

**Table S2.** Melting temperatures and optimal crystallization temperatures of different types of QDs-embedded glasses.

| Type of QDs and Glass matrix                | Melting Temp. (°C) | Opt. Crystallization Temp. (°C) | Ref. |
|---------------------------------------------|--------------------|---------------------------------|------|
| CsPbBr <sub>3</sub> /borosilicate glass     | 1200               | 470                             | 26   |
| CsPbBr <sub>3</sub> /phosphosilicate glass  | 1100               | 450                             | 27   |
| CsPbBr <sub>3</sub> /germanate glass        | 1050               | 460                             | 28   |
| CsPbBr <sub>3</sub> /tellurium borate glass | 650                | 280                             | 12   |

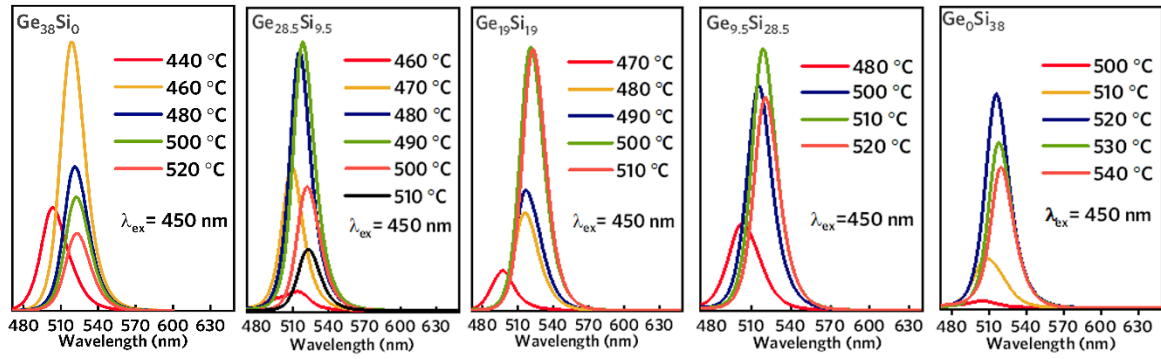

**Fig. S1.** Photoluminescent (PL) spectra of Ge<sub>38</sub>Si<sub>0</sub>, Ge<sub>28.5</sub>Si<sub>9.5</sub>, Ge<sub>19</sub>Si<sub>19</sub>, Ge<sub>9.5</sub>Si<sub>28.5</sub> and Ge<sub>0</sub>Si<sub>38</sub> specimens heat-treated at 440~540 °C for 10 h. (from left to right: Ge<sub>38</sub>Si<sub>0</sub>, Ge<sub>28.5</sub>Si<sub>9.5</sub>, Ge<sub>19</sub>Si<sub>19</sub>, Ge<sub>9.5</sub>Si<sub>28.5</sub> and Ge<sub>0</sub>Si<sub>38</sub>)

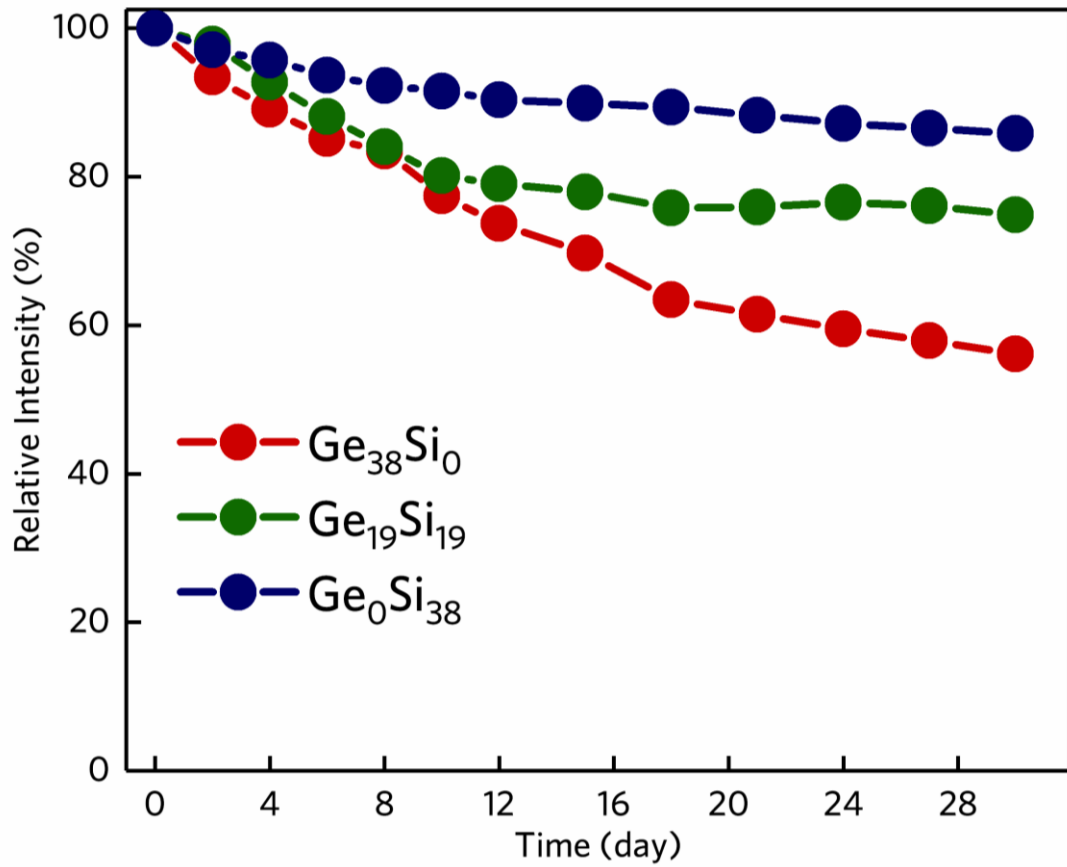

**Fig. S2. Water-resistance testing.** The quantified result of PL integrated intensity of Ge<sub>38</sub>Si<sub>0</sub>, Ge<sub>19</sub>Si<sub>19</sub>, and Ge<sub>0</sub>Si<sub>38</sub> immersing into deionized water for 30 days.

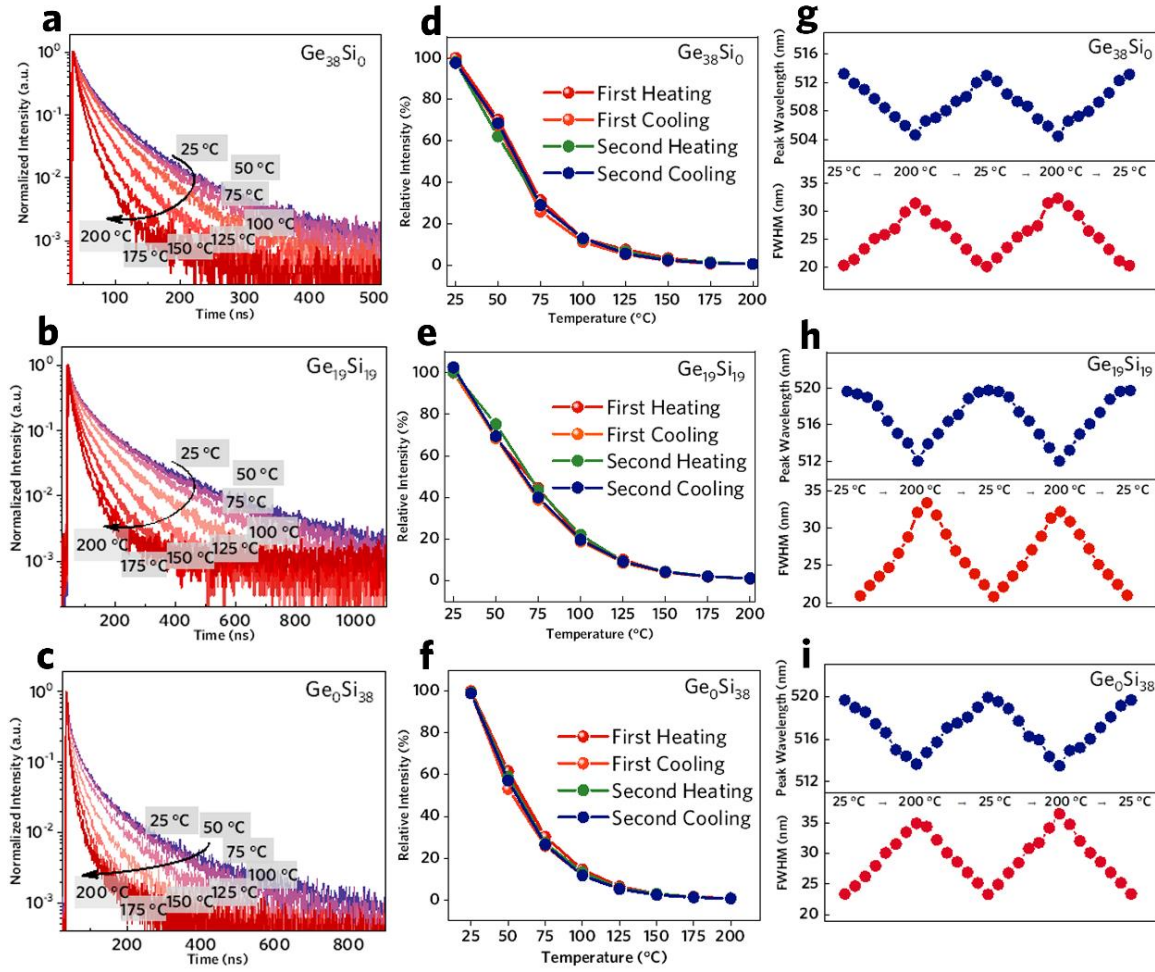

**Fig. S3.** Temperature-dependent decay-time of a)  $\text{Ge}_{38}\text{Si}_0$ , b)  $\text{Ge}_{19}\text{Si}_{19}$ , and c)  $\text{Ge}_0\text{Si}_{38}$  samples. Temperature-dependent integrated PL intensity of a)  $\text{Ge}_{38}\text{Si}_0$ , b)  $\text{Ge}_{19}\text{Si}_{19}$ , and c)  $\text{Ge}_0\text{Si}_{38}$  samples. Temperature-dependent peak wavelength and FWHM of a)  $\text{Ge}_{38}\text{Si}_0$ , b)  $\text{Ge}_{19}\text{Si}_{19}$ , and c)  $\text{Ge}_0\text{Si}_{38}$  samples.

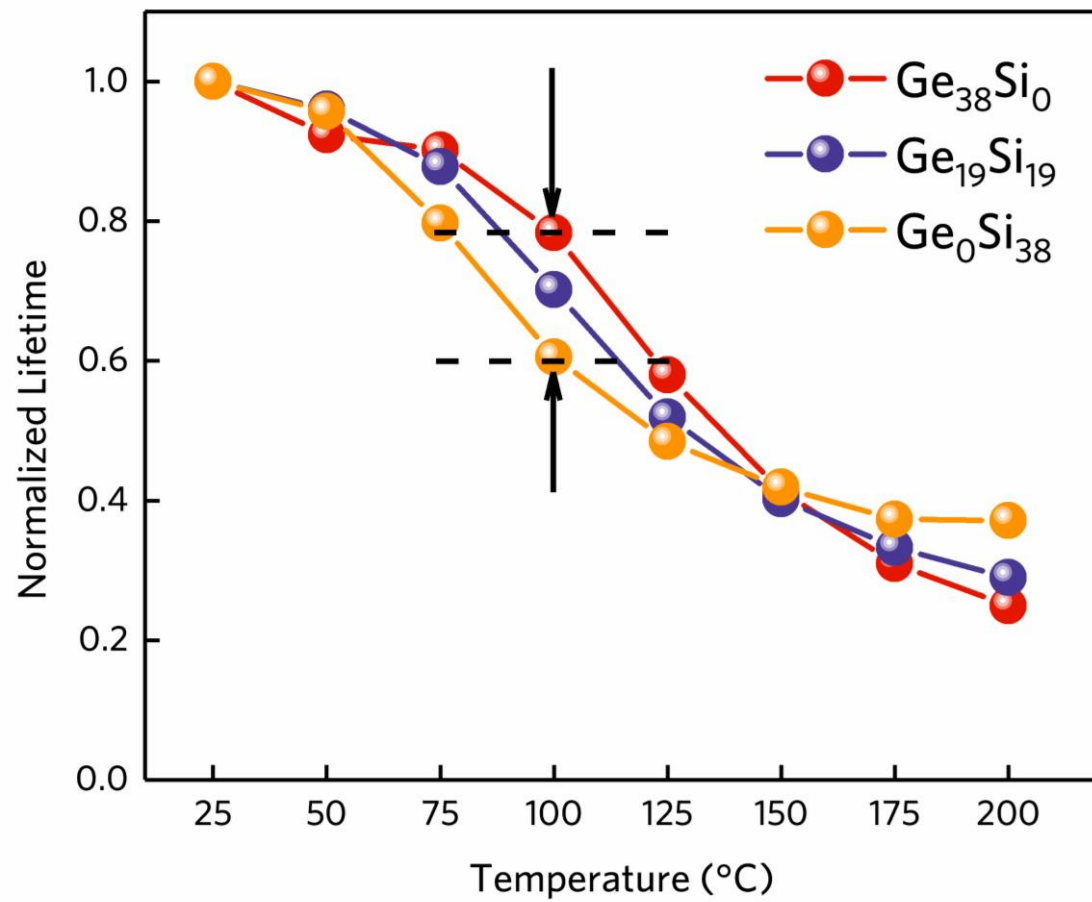

**Fig. S4.** The variation of average lifetime as a function of temperature.

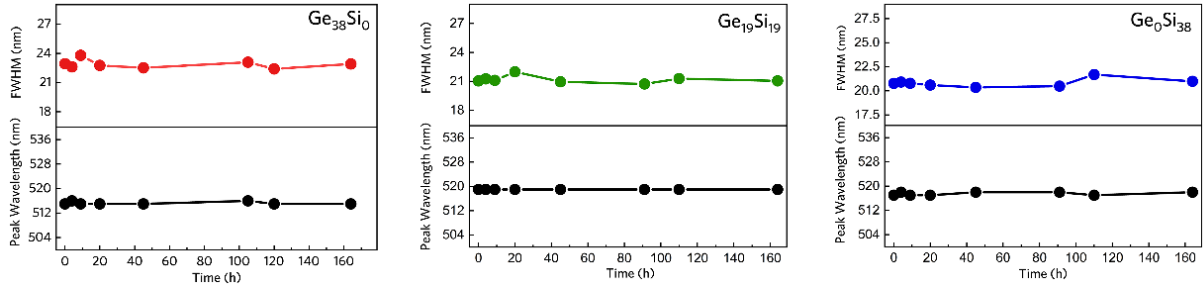

**Fig. S5. Photostability testing.** Variations in peak wavelength and FWHM of (a)  $\text{Ge}_{38}\text{Si}_0$ , (b)  $\text{Ge}_{19}\text{Si}_{19}$ , and (c)  $\text{Ge}_0\text{Si}_{38}$  samples.



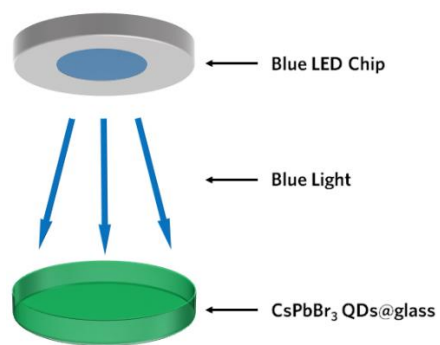

**Fig. S6.** The schematic diagram of photostability test using 3 W 450 nm LED chip as light source.
